# Supplementary material
Source: PubMed Central journal article supplement (PMC3043358)
Supplement: NIHMS272155-supplement-272155.pdf [file NIHMS272155-supplement-272155.pdf]

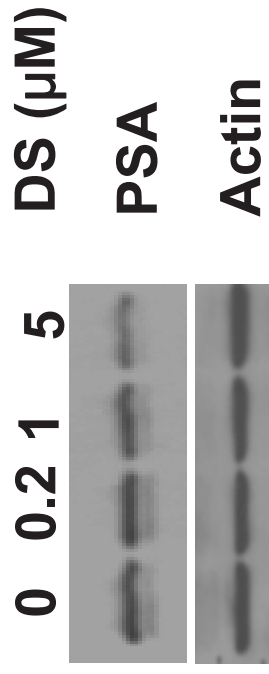

### Supplementary Figure. 1

Expression of PSA was monitored by Western blot following treatment of C4-2B cells with the indicated doses of disulfiram (DS) for 48 hours. Actin was used as a loading control.
